# Supplementary material
Source: Springer Nature journal article supplement (https://www.springermedizin.de/resource/supplementary/12990_2008_158_MOESM7_ESM.pdf/9612690)

**a**

TRPV1+M3+GFP

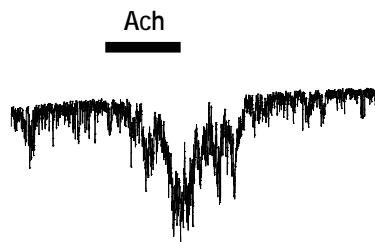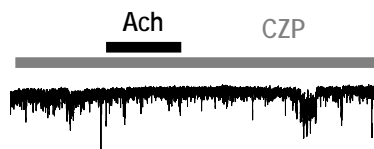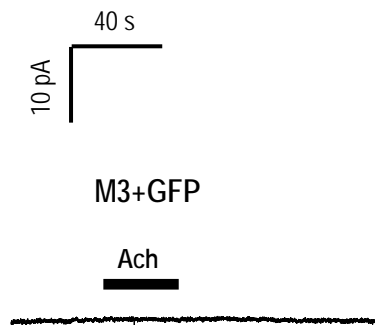**b**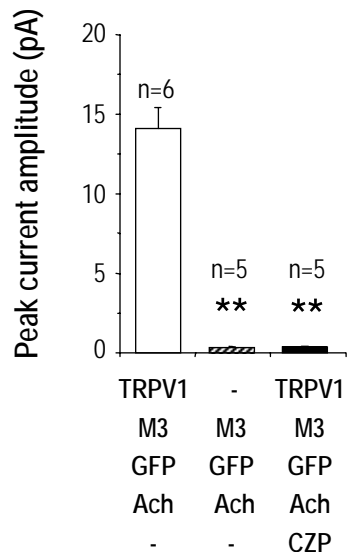

Supplement: MOESM7 [file 9612690]
